# Supplementary material for: Feeding the world with soil science: embracing sustainability, complexity and uncertainty
Source: Copernicus journal article supplement (doi:10.5194/soil-2016-7), 2016-03-09
Supplement: Supplementary file [file soil-2016-7-AC1-supplement.pdf]

1 **Feeding the world with soil science: embracing sustainability, complexity**  
2 **and uncertainty**

3

4 Pablo Tittonell<sup>1,2,\*</sup>

5 <sup>1</sup>Farming Systems Ecology, Wageningen University, The Netherlands

6 <sup>2</sup>Natural Resources and Environment, Instituto Nacional de Tecnología  
7 Agropecuaria (INTA), Argentina

8

9 \*Modesta Victoria 4450, CC 277 (8400) San Carlos de Bariloche, Río Negro,  
10 Argentina

11

12 **Abstract**

13 Feeding a growing and wealthier population while providing other ecosystem  
14 services and meeting social and environmental goals poses serious challenges to  
15 soil scientists of the 21<sup>st</sup> Century. In particular, three dimensions inherent to  
16 agricultural systems shape the current paradigm under which science has to  
17 contribute knowledge and innovations: sustainability, complexity and  
18 uncertainty. The current model of agricultural production, which is also often the  
19 source of inspiration to propose solutions for future challenges, fails at  
20 internalizing these dimensions. It simply does not provide the necessary means  
21 to address sustainability, complexity or uncertainties. Part of the problem is that  
22 these are soft concepts, as opposed to hard goals, and so their definition and  
23 their translation into concrete actions is always subjective. They have to be  
24 sufficiently defined for soil science to embrace them in order to propose viable  
25 solutions to (i) produce food where it is most needed, (ii) decouple agricultural  
26 production from its dependence on non-renewable resources, (iii) recycle and  
27 make efficient use of available resources, (iv) adapt to and reduce the risks  
28 associated with global change, and (v) restore the capacity of degraded soils to  
29 provide ecosystem services. This paper examines what the concepts of  
30 sustainability, complexity and uncertainty mean and imply for soil science,  
31 focusing on the five priorities enunciated above. It also summarizes and  
32 proposes new research challenges for soil scientists of the 21<sup>st</sup> Century.

33 **Keywords:** food security; nutrition; global change; soil degradation; agriculture

1 **1. Introduction**

2

3 Feeding a growing and increasingly affluent population while providing other  
4 ecosystem services, and meeting the social and environmental targets of the UN  
5 Sustainable Development Goals (SDG), poses serious challenges to the  
6 management of terrestrial ecosystems used for primary production – and hence  
7 to soil scientists of the 21<sup>st</sup> Century (Keesstra et al., 2016). Agroecosystems are  
8 complex, dynamic socio-ecological systems in which soils play roles that are  
9 central to their functioning (Walker et al., 2010). They exhibit a number of  
10 properties that can be characterized as structural and dynamic, and are  
11 governed by both biophysical processes and human agency (Conway, 1987). The  
12 design of soil management strategies to meet the SDGs requires knowledge and  
13 innovation, and embracing three dimensions that define the way we regard  
14 agroecosystems nowadays: the notions of sustainability, complexity and  
15 uncertainty. These dimensions describe respectively our aspirations, our  
16 understanding, and the challenges we face towards the future management of  
17 agroecosystems.

18

19 The currently hegemonic model of agricultural production issued from the green  
20 revolution, and more recently fuelled by advances in genetic engineering and the  
21 agrochemical industry, appears often as the primary source of a soil scientist’s  
22 inspiration to propose solutions for future challenges. This is evident from the  
23 report prepared by the Thematic Group on Sustainable Agriculture and Food  
24 Systems of the Sustainable Development Solutions Network (SDSN, 2013), which  
25 offers new, ‘improved’ versions of old remedies. In other words, under the optic  
26 of this report, the solution to the problems *caused* by current agriculture  
27 intensification, or to the problems it *fails* to address, are to come from yet further  
28 agricultural intensification. Except that now this is branded as ‘sustainable’  
29 intensification. Conspicuous examples of this type discourse are such concepts as  
30 precision agriculture, good agricultural practices, the development of toxin-  
31 producing GM plants supposed to replace pesticides, or more generally the eco-  
32 efficiency and sustainable intensification discourses (cf. Tittonell, 2014a). In my  
33 view, these solutions have little chance to help us achieve the SDG because they

1 fail to internalize what sustainability, complexity and uncertainty mean for the  
2 management of agro-ecosystems.

3

4 Part of the problem is that sustainability, complexity and uncertainty are soft  
5 concepts, as opposed to hard goals. Their definition and their translation into  
6 concrete actions are unavoidably subjective (Meynard et al., 2012). Subjectivity  
7 governs the way in which we perceive and diagnose a problem, as well as the  
8 way in which we come up with solutions. A wrong diagnosis generally leads to  
9 proposing the wrong solution. In many cases the solution to a problem is even  
10 chosen *a priori*, without properly assessing the problem nor the potential impact  
11 of the proposed solution. Blame subjectivity. Or, in the words of Prell et al.  
12 (2007), "*if you have a hammer everything looks like a nail*". For example, a well-  
13 intentioned soil scientist working on crop nutrition and soil fertility is often  
14 inclined to think that the solution to food security, or more generally to achieving  
15 the SDGs, will likely come from ample adoption and proper use of fertilisers (e.g.  
16 the Fertiliser declaration of the Abuja Summit, 2006). Yet, after 40 years of such  
17 policies in places like sub-Saharan Africa, and exactly ten years after this new  
18 impetus was installed, we fail to see much progress in terms of agricultural  
19 productivity, in per capita income or food availability in rural areas (UNCTAD,  
20 2013; 2014). Most conspicuously, and with the exception of very localised  
21 examples, there was weak progress in fertiliser adoption and use in spite of  
22 national policies and large international support to achieve that, while soil  
23 fertility continues to decline.

24

25 It is easy to blame policy makers or the social and economic context for lack of  
26 incentives to the adoption of technologies, but why not questioning ourselves,  
27 soil scientists, whether the solutions we propose are in themselves real solutions  
28 to actual problems? This challenges us to revisit our research and its  
29 contribution to solving the world's problems from an operational perspective  
30 (how do we make sure that our research is sound and solid?), from an  
31 epistemological perspective (how do we know that we are addressing the right  
32 questions, employing the right methods to approximate the truth?), but also  
33 from its ontological grounds (how do we know what the right questions and

1 relevant problems really are?). The concepts of sustainability, complexity and  
2 uncertainty in the context of agroecosystems can shed some light on this. They  
3 have to be adequately defined and operationalized for soil science to contribute  
4 viable solutions to five priorities that I deem central to achieving food security:

- 5 (i) produce food where it is most needed;
- 6 (ii) decouple agricultural production from its dependence on non-  
7 renewable resources;
- 8 (iii) recycle and make efficient use of available resources;
- 9 (iv) adapt to and reduce the risks associated with global change; and
- 10 (v) restore the capacity of degraded soils to support food production and  
11 other ecosystem services.

12 Some of these priorities need to be further unpacked to be of real use. Priority  
13 (iv) for example could be disaggregated into an array of global change adaptation  
14 priorities. Yet this paper builds up from the introductory paper to this special  
15 issue by Keestra et al. (2016), where many of these priorities were already  
16 discussed in more detail. Here I examine specifically what the concepts of  
17 sustainability, complexity and uncertainty mean and imply for soil science in  
18 general and for these priorities in particular (cf. Table 2). I focus on the second  
19 one of UN Sustainable Development Goals, Food Security and Nutrition, and  
20 outline emerging challenges for us soil scientists of the 21<sup>st</sup> Century.

## 22 **2. Definitions**

### 24 **2.1 Sustainability**

25  
26 Much has been said and written about sustainability (e.g., most recently: James et  
27 al., 2014; Kahle and Gurel-Atay, 2015). Here, I concentrate on the aspects of  
28 sustainability that can help us think through our soils research and its  
29 contribution to food security and nutrition. The most widely quoted definition of  
30 sustainability is that used by the Brundtland Commission of the United Nations  
31 (1987) to define sustainable development as: “[...] *development that meets the*  
32 *needs of the present without compromising the ability of future generations to*  
33 *meet their own needs.*” Yet, in ecology, sustainability has a more strict definition

1 and means 'the capacity to endure', the ability of ecosystems to remain  
2 productive and diverse indefinitely, bearing a much closer relationship with its  
3 etymology. Sustainability derives from the Latin term *sustinere*, formed by the  
4 particles *sub-* (up from below) and *tenere* (to hold), which resulted in the terms  
5 *sostenir* (old French) and *sustain* (English). The term *sustain* appeared in the  
6 western literature since c. 1300 with the following meanings: give support to,  
7 hold up, maintain, endure, bear, undergo, continue, keep up, endure without  
8 failing or yielding, etc. Sustainability is thus the ability to sustain. The adjective  
9 sustainable has been used to mean 'bearable' since 1610s, 'defensible' since  
10 1845, and 'capable of being continued at a certain level' since 1965, when it was  
11 used to describe sustainable growth (cf. Douglas-Harper Etymology Dictionary,  
12 2015).

13

14 Well-functioning, resilient soils are those able to hold agroecosystems 'up from  
15 below', to sustain their ability to deliver ecosystem services now and in the  
16 future, and to endure the stresses and shocks – anthropogenic or from other  
17 origins – that agroecosystems may be subject to. Policies, management practices  
18 or technological innovations that compromise the ability of soils to sustain  
19 current and future agroecosystems functioning and endurance can be thus  
20 defined as *un-sustainable*. In line with the approach to agroecosystems as socio-  
21 ecological systems, sustainable development *sensu* Brundtland recognizes four  
22 interconnected domains: ecology, economics, politics and culture (Kates, 2011).  
23 Sustainable development implies tradeoffs between objectives derived from  
24 these four domains, and how societies chose between these tradeoffs is central  
25 to sustainability (e.g. Anderson et al., 2015). Let us amend the previous  
26 statement: Policies, management practices or technological innovations that  
27 compromise agroecosystem functioning and endurance, and/or that impact  
28 negatively on the wider societal and environmental objectives, can be regarded  
29 as unsustainable.

30

31 There are a few grey zones associated with this definition of sustainability that  
32 deserve further thinking, particularly in the realm of soil science:

- 1       1. *Subjectivity.* Sustainability is a soft concept. It is basically a normative  
2       assertion about choices among societal values. Every social or interest  
3       group will define sustainability and choose its own indicators and  
4       thresholds to make it operational. Is preserving a native forest a  
5       sustainable activity? Is maintaining a living topsoil a sustainable choice?  
6       Is preventing crop residue grazing by livestock in order to restore organic  
7       carbon to soil a sustainable practice? Societies, or power groups within  
8       them, may be ready to trade-off the benefits that can be derived from  
9       these management options in order to satisfy other priorities – to  
10      everyone or just to a few – at any given moment in time.
- 11      2. *Boundaries.* Sometimes the causes and consequences of ‘sustainable’  
12      decisions are delocalized. This depends on the boundary conditions  
13      chosen to define an agroecosystem. A social group may agree on a certain  
14      management practice or policy that leads to greater sustainability  
15      outcomes within the boundaries of their own ecosystems, but their  
16      choices may result in unsustainable outcomes elsewhere. This is not  
17      uncommon in a globalized economy and the examples are plenty. Such  
18      externalities– often overlooked in sustainability assessments – include  
19      aquifer pollution through leaching or the siltation of waterways due to  
20      soil erosion and sediment transport beyond the boundaries of the  
21      agroecosystem.
- 22      3. *Thresholds.* As societies trade-off among values to norm on what is  
23      considered sustainable or not, the thresholds necessary to operationalize  
24      these norms are also the result of negotiations and power balances. One  
25      example that relates to soils is the acceptable pollution thresholds defined  
26      for glyphosate concentrations in water. Tolerance levels are set at 700  
27      ppb in the USA, at around 300 ppb in countries like Argentina or Canada  
28      and at 0.01 ppb in Europe. Such broad discrepancies are not the result of  
29      scientists in Europe and the Americas having found different empirical  
30      evidence on Glyphosate toxicity in water. They are just the result of the  
31      capacity for lobbying, negotiation, or weight throwing of different interest  
32      groups in European and American societies.

- 1       4. *Objectives.* As the term sustainability is reminiscent of such notions as  
2       maintaining, enduring, etc., it somehow falls short of describing other  
3       important goals of agroecosystem management. Land degradation  
4       assessments based on NDVI trends estimate that about 25% of the  
5       agricultural land in the world is in a severely degraded state (Vlek et al.,  
6       2008). Much of this is explained by soil degradation (Bai et al., 2008).  
7       Sustainability implies that in many cases it is not enough with  
8       maintaining the *status quo* or 'conserving' soils. Sustainable soil  
9       management may require soil restoration (degraded land) or soil  
10      aggradation (inherently unproductive land) as well – i.e., a sort of  
11      aggradation-conservation agriculture may be needed, cf. Tittone et al.,  
12      2012).
- 13      5. *Predictability.* It is hard to foresee what the next generations will need in  
14      terms of resources and ecosystem services. Up until the 19<sup>th</sup> century salt  
15      was an important asset and even wars were fought about its sources (e.g.  
16      the Wars of the Pacific, 1879-1883). The efficient use and exploitation of  
17      salt would have been a sustainability premise in the past, up until the  
18      moment when other technologies replaced the need for salt. Likewise, it is  
19      hard to foresee the actual consequences of our current soil use and  
20      management for the future generations. How do we know if a current  
21      disturbance will lead to a future problem or a future advantage? Think of  
22      the high cultural value assigned today to formerly degraded landscapes,  
23      such as the dune landscape in north-western Europe that originated after  
24      massive peat extraction from the soil surface, or the high economic value  
25      of okoumé (*Aucoumea klaineana*) trees in Equatorial west Africa, that  
26      grow in places that were cleared through slash and burn agriculture in  
27      the past.

28      One may well imagine that healthy soils and ecosystems will be as necessary for  
29      food production in the future as they are today – as they have been for over 7  
30      millennia – but it might well be that the prime functions and services they are  
31      expected to provide will be other than those of today. These grey zones pose  
32      important ontological questions to soil scientists of the 21<sup>st</sup> century. Yet they  
33      should not be used as arguments to disturb ecosystems beyond acceptable

1 thresholds, which must be defined using our best available scientific knowledge.  
2 It makes sense to be conservative when it comes to choosing thresholds to assess  
3 sustainability, particularly in the case of practices or technologies that may have  
4 long term impacts on society and the environment that are yet unknown or  
5 poorly understood. The goal of sustainable development is to propend towards a  
6 form of intergenerational equity, maintaining the ability of global ecosystems to  
7 sustain future generations.

8

## 9 **2.2 Complexity**

10

11 We take for granted that agroecosystems are complex yet they are often a  
12 simplified version of a natural ecosystem. Through agriculture, we have  
13 simplified natural ecosystems so that the flows of solar energy, water and  
14 nutrients can be steered in the narrow direction of producing selected forms of  
15 plant and animal biomass. Complexity was inevitably lost in the process. When  
16 assessed through indicators such as heterogeneity, diversity, dynamics and  
17 feedbacks, we can attest dramatic losses in structural, organisational and  
18 functional complexity of ecosystems through agriculture. A conspicuous example  
19 would be the loss of structural and functional complexity of soil biodiversity  
20 when forest soils are put under grazing or cultivation (e.g. Lupatini et al., 2012).  
21 The human dimension of agroecosystems, however, introduces new forms of  
22 complexity that are hard to unravel using ecological knowledge and principles.  
23 The actual complexity inherent to agroecosystems can only be understood when  
24 they are perceived as social-ecological systems.

25

26 Complexity can be seen as the mere number of components and interrelations in  
27 a system, or defined by the nature of such relationships, or by the emerging  
28 properties associated with them. Complexity can be associated too with the level  
29 of knowledge we have about the functioning of a system: less understood  
30 systems tend to be considered more complex. In soil science, complexity has  
31 been most often studied in the various fields of soil biology, notably through the  
32 study of soil trophic networks, but also in the study of the physicochemical  
33 properties, functioning and spatial arrangement of the minerals and particles



1 that define soil composition and structure. More recently, the notion of  
2 complexity and ways of assessing it have been applied in the study of the close  
3 links between soil management, spatial patterns and collective human decisions  
4 or social networks (Rufino et al., 2011; Isaac, 2012; Tittonell, 2014b; Andrieu et  
5 al., 2014; Baudron et al., 2014; Speelman et a., 2014). The next examples will  
6 focus on these aspects of social-ecological systems, as they bear a close  
7 relationship with the challenge of achieving the UN Sustainable Development  
8 Goals through soil science.

9

### 10 *Collective action and decision-making*

11 Introducing a technology or a set of soil management principles in a rural  
12 community is often a challenge. Lack of adoption is generally ascribed to the  
13 communities' poor understanding of the benefits of the technology, to their lack  
14 on interest in or need for it, or to the absence of economic, social or policy  
15 incentives to implement it. Often the problem is much more complex than that,  
16 requiring fine-tuned adaptation, targeting, local ownership and embedding in  
17 social-ecological contexts (cf. Coe et al., 2014). In Malawi, soil and water  
18 conservation measures have been profusely promoted to halt soil degradation  
19 and increase agricultural productivity in the recent past. Some communities  
20 were more prone than others to adopt them. In-depth social studies in some of  
21 these communities of adopters and non-adopters revealed that the topology of  
22 the local social networks that characterised each community was closely  
23 associated with the level of adoption of soil and water conservation measures  
24 proposed to them (Khonje, 2012; Figure 1).

25

26

1

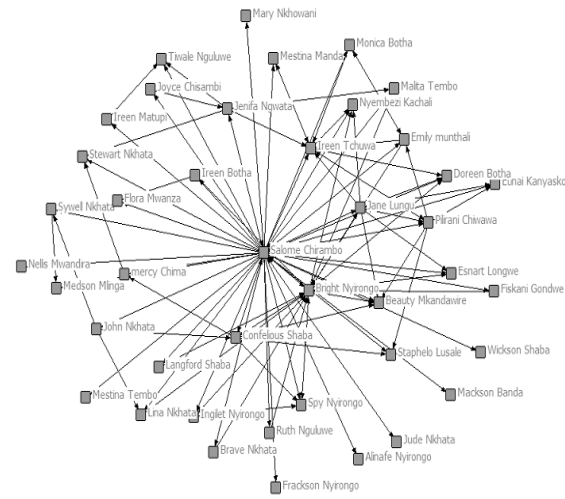

2

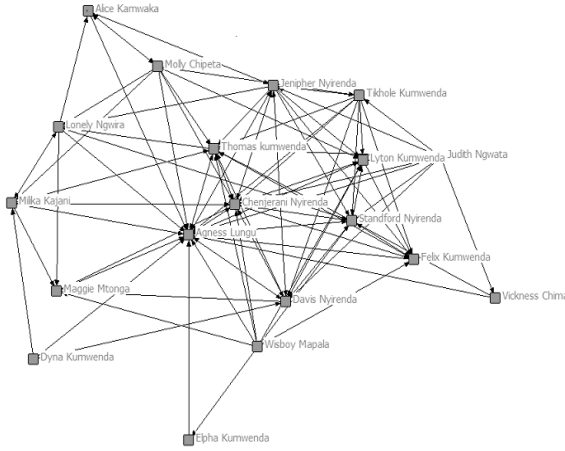

3

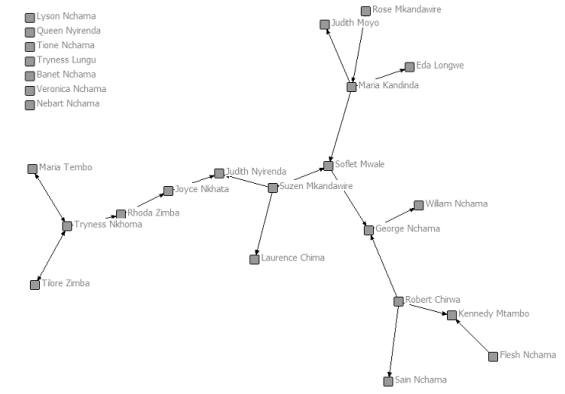

4

5 Figure 1: Social network topologies of three villages in Malawi: (A) Ziwambera; (B) Kanyinbwa;  
 6 (C) Kamkondo (Source: K. Khonje 2012, Wageningen University).

7

8 It must be recalled that several soil and water conservation measures, such as  
 9 building terraces, planting tree lines or digging ditches, require collective effort  
 10 by members of the community, especially when the landscape is fragmented into  
 11 very small properties (of often less than half a hectare). The community of  
 12 Ziwambera village, where the adoption of soil and water conservation measures

1 was successful, exhibited a traditional type of social organisation, in which it is  
2 possible to evidence the strong leadership of a local chief, who relates to the rest  
3 of the households often through family ties (Fig. 1A). Kanyimbwa village social  
4 network reveals a situation in which more than one strong node of relations  
5 exists, resulting in a more complex and diverse communal decision-making  
6 model (Fig. 1B). Kamkondo village social network points to a loosely connected  
7 society (Fig. 1C), composed largely by migrating families with rather weak ties  
8 amongst them, with unconnected households, with ties to nearby townships as  
9 well, and where community action is hard to coordinate. Non-surprisingly, soil  
10 and water conservation measures that required collective effort were least  
11 adopted in the latter community. Social network structures can also enhance or  
12 hinder the flow of information amongst members of the community and very  
13 strongly influence adoption (Khonje, 2012).

14

#### 15 *Resource flow networks*

16 At farm level, complexity is evident in the way diversity is organised.  
17 Diversification of farm activities *per se* brings about greater resilience and  
18 adaptability in the face of external shocks, such as low or volatile prices, a  
19 drought or a pest outbreak. This is due to risk spreading, or the classical egg-in-  
20 different-baskets effect. Yet diversity *per se* is not enough to grant efficiency in  
21 resource use, as observed for example amongst family dairy farmers in Mexico  
22 by Cortez-Arriola et al. (2014) or in wheat-based systems of the eastern Indo-  
23 Gangetic plains by Aravindakshan et al. (2015). To be functional to a given  
24 objective, diversity must be organised in a certain way. In ecology as well as in  
25 agriculture, the relationship between biodiversity and efficiency, for example  
26 nutrient use efficiency, is generally elusive, and it may become evident only  
27 when moving across scales. Processes deemed inefficient at one scale may  
28 contribute to greater system efficiency at higher scales (van Noordwijk and  
29 Brussaard, 2014). The analysis of individual farms as ecological networks in  
30 crop-livestock agroecosystems of East and southern Africa revealed however  
31 that resource (nitrogen in this case) use efficiency was closely associated with  
32 the complexity and organisation of the internal network of resource flows  
33 (Rufino et al., 2009; Alvarez et al., 2012). Across household types and climatic

1 regions, N use efficiency and food self-sufficiency at farm level were better  
 2 explained by the nature of the resource flow network complexity, in the form of  
 3 path organisation and internal recycling, than by the total amount of externally-  
 4 sourced N entering and flowing through the farm system annually (Table 1).

Table 1: Indicators of resource endowment, and of the size and organisation of the network of nitrogen flows within eight case study smallholder farms (from: Rufino et al., 2009; Alvarez et al., 2012)

| Location/<br>Farm type | Cropped<br>land<br>(ha) | Livestock<br>owned<br>(TLU) | Farm N network size        |                              |                             | Farm N network organisation   |                       | Farm N<br>use<br>efficiency<br>(kg kg N <sup>-1</sup> ) | Food self<br>sufficiency<br>ratio |
|------------------------|-------------------------|-----------------------------|----------------------------|------------------------------|-----------------------------|-------------------------------|-----------------------|---------------------------------------------------------|-----------------------------------|
|                        |                         |                             | Total system<br>throughput | Dependency on<br>imports (%) | Finn's cycling<br>index (%) | Average mutual<br>information | Diversity of<br>flows |                                                         |                                   |
| Ethiopia               |                         |                             |                            |                              |                             |                               |                       |                                                         |                                   |
| Poorer                 | 0.3                     | 1.2                         | 230                        | 72                           | 2.9                         | 1.1                           | 2.2                   | 23                                                      | 0.4                               |
| Wealthier              | 2.4                     | 10.0                        | 1340                       | 66                           | 2.6                         | 1.3                           | 2.4                   | 18                                                      | 1.7                               |
| Kenya                  |                         |                             |                            |                              |                             |                               |                       |                                                         |                                   |
| Poorer                 | 1.0                     | 0                           | 45                         | 45                           | 2.2                         | 1.1                           | 2.5                   | 74                                                      | 0.3                               |
| Wealthier              | 2.9                     | 3.5                         | 190                        | 34                           | 11.0                        | 1.7                           | 3.3                   | 216                                                     | 1.2                               |
| Zimbabwe               |                         |                             |                            |                              |                             |                               |                       |                                                         |                                   |
| Poorer                 | 0.9                     | 0.3                         | 40                         | 65                           | 0.9                         | 1.0                           | 2.2                   | 44                                                      | 0.5                               |
| Wealthier              | 2.5                     | 5.4                         | 480                        | 45                           | 5.5                         | 1.5                           | 2.9                   | 86                                                      | 3.4                               |
| Madagascar             |                         |                             |                            |                              |                             |                               |                       |                                                         |                                   |
| Poorer                 | 2.7                     | 3                           | 110                        | 33                           | 3.5                         | 1.2                           | 2.6                   | 122                                                     | 1.9                               |
| Wealthier              | 6.9                     | 12                          | 400                        | 31                           | 2.5                         | 1.4                           | 3.4                   | 198                                                     | 4.7                               |

Total system throughput is the sum of all N flows between all components (activities) of the farming system, expressed here in kg N per family member to allow for comparisons across farms of different size; Dependency on imports is the ratio between N flows into the farm system and total system throughput; Finn's cycling index is calculated as the ratio of the sum of all internal flows to total system throughput; Average mutual information (AMI) is the average number of connexions of each system component and the diversity of flows (HR) or statistical uncertainty is the maximum number of possible connexions between components, or the upper limit to AMI; both AMI and HR are measured in bits (binary decisions); if all the components of a system are connected and the total flow is equally distributed among all components, AMI will approach zero; typical values of AMI in natural ecosystems range between 0 and 6; Farm N use efficiency is the ratio of total biomass productivity to total N flowing into the system; Food self-sufficiency ratio is the ratio of edible calories produced on farm to caloric household needs.

6

7

8 *Spatial patterns*

9 At field scale, soil complexity is often reflected in its spatial heterogeneity, which  
 10 is both inherent to soils and also the result – intentional or not – of human  
 11 agency. I have worked extensively on the study of spatial soil heterogeneity, its  
 12 causes and consequences, in smallholder African agriculture (e.g. Tittonell et al.,  
 13 2005a,b; 2008; 2010; 2013; 2015; etc.). Figure 2 summarises schematically the  
 14 three most common patterns of soil heterogeneity that can be found across sub-  
 15 Saharan Africa. Fig. 2A represents the somewhat classical ring effect documented  
 16 by Prudencio (1993) in Sudano-sahelian zones of West Africa, which describes a  
 17 gradual decline in soil fertility at increasing distances from the homesteads,  
 18 organised in villages or *hameaux*. Fig. 2B illustrates discrete patterns of spatial  
 19 heterogeneity in highly populated and fragmented landscapes, in which  
 20 homesteads are not centralised in a village but located within individually owned  
 21 farms, and where soil fertility declines at increasing distances to them (e.g.  
 22 Tittonell, 2003). One of the most common patterns in less populated regions of  
 23 East and southern Africa is the discontinuous gradient, which strictly speaking is  
 24 not really a gradient (Fig. 2 C). In these patterns, described in Zimbabwe by e.g.  
 25 Carter and Murwira (1995), village fields and outfields are not necessarily  
 26 contiguous as in the West African case. Due to the rapid increase in population

1 densities that can be seen in rural Africa the first and the last pattern are  
2 gradually disappearing, tending towards more fragmented, spatially  
3 heterogeneous situations as that illustrated in Fig. 2 B.

4

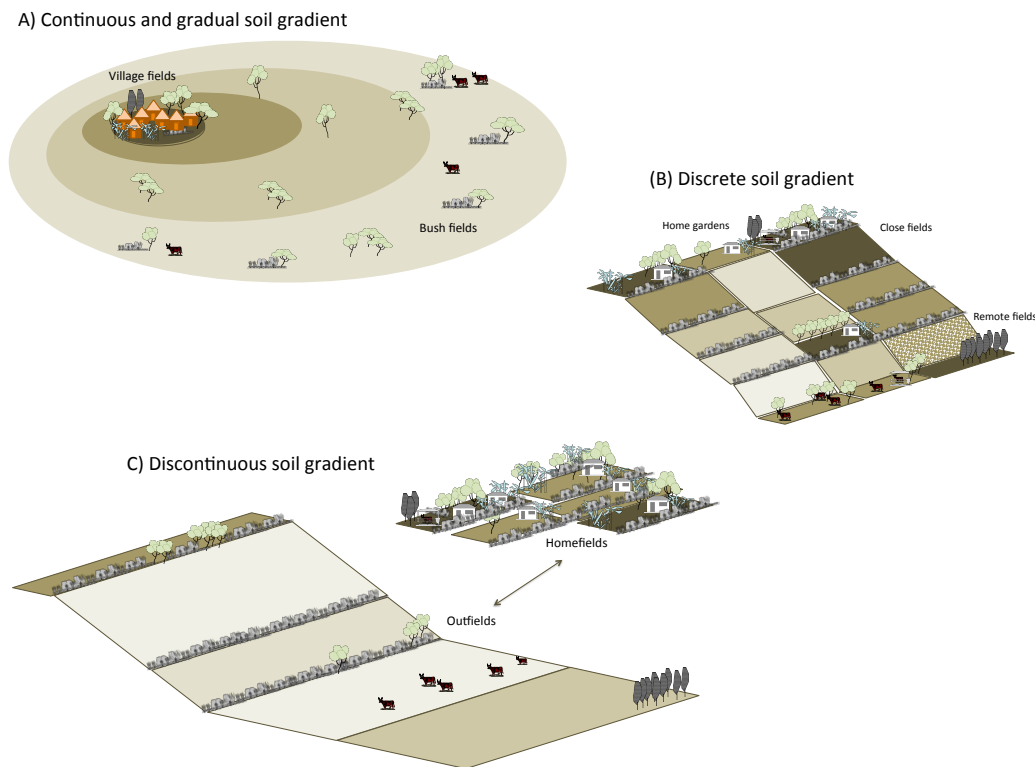

5

6 Figure 2: Schematic representation of common spatial patterns of soil heterogeneity in  
7 smallholders farming systems of sub-Saharan Africa. Modified from Tittonell et al., 2015.

8

9 Spatial soil heterogeneity is important because it is associated to a variable  
10 extent with heterogeneity in crop productivity, in their response to nutrient  
11 additions, or in the performance of soil improving technologies (Vanlauwe et al,  
12 2006; Wopereis et al., 2006; Zingore et al., 2007; Fermont et al., 2009; Tittonell  
13 and Giller, 2013; Bruelle et al., 2015; Diarisso et al., 2015). Fertiliser  
14 recommendations tend to fail in sub-Saharan Africa due to this mere reason. The  
15 agronomic and economic efficiencies of fertiliser use can vary from benefit to  
16 failure within a single, spatially heterogeneous farm. N-fixing legumes may not  
17 be able to grow – let alone to fix N – in the poorest or degraded fields of small  
18 heterogeneous farms (Giller et al., 2011). But spatial heterogeneity is also  
19 important because in some cases it is the result of farmers' intention. Farmers  
20 may create 'islands of soil fertility' by concentrating resources in small portions

1 of land, where yields are secured through more intense crop husbandry, early  
2 planting and nutrient additions from diverse sources (Henry et al., 2009;  
3 Castellanos-Navarrete et al., 2014; Diarisso et al., 2015). Such fields tend to  
4 exhibit greater soil organic matter, nutrient availability and water holding  
5 capacity, and a great diversity of plant species grown in association, which  
6 contribute to household nutrition through diverse diets (Figueroa-Gomez et al.,  
7 2008). These fields can be also seen as a bank or an insurance asset to secure  
8 food production in years of scarcity or erratic rainfall, thereby contributing to  
9 whole-system resilience (cf. Tiftonell, 2014b).

10

11 The above examples indicate that agroecosystem complexity is not scale-  
12 agnostic. Understanding complex social relations at village or landscape level,  
13 complex networks of resource flows at farm scale, or complex patterns of natural  
14 or human-induced soil spatial heterogeneity at field scale are central to the  
15 design of soil management strategies towards the achievement of the SDG. The  
16 approaches to be used in soil science must therefore embrace scale-dependency.  
17 A classical way of dealing with scales and integration levels in soil science, and  
18 agricultural science in general has been through the model of hierarchical  
19 confinement (e.g. Fresco and Westphal, 1988). Although this model became  
20 virtually obsolete after the notion of *panarchy* emerged in ecology (Gunderson  
21 and Holling, 2001), it is still widely applied in soil science and must be revised in  
22 the light of new insights from complex systems theory (Vandermeer and  
23 Perfecto, 2013) – another white glove lying on the ground of soil scientist of the  
24 21<sup>st</sup> century.

25

### 26 **2.3 Uncertainty**

27

28 Uncertainty in agroecosystems is associated with the probability of occurrence  
29 of a certain event and with the sensitivity to and type of response to this event  
30 that may be expected. Events are normally associated with the behaviour of  
31 external driving variables, such as market or climatic ones, but also with a  
32 systems' own structure and function. Uncertainty may arise from stochastic  
33 processes and/or unforeseeable futures, but also from our inability to yet

1 understand how things work in nature. There are thus cases in which the type of  
2 response to be expected is not known *a priori*, and there are others in which  
3 possible responses are known but their patterns, in terms of extent or intensity  
4 are not known. These two types of cases define two different domains of  
5 research questions relevant to soil science and agriculture. The first one, the  
6 uncertainty about the unknown, relates to science's continuous quest to unravel  
7 reality and how it works. The second one refers to the probability of occurrence  
8 of a known response, which in agriculture often boils down to risk assessments.  
9 Climatic risks and price risks are inherent to agriculture, and proper soil  
10 management may help curtail them. But the risk of not obtaining the expected  
11 response to a given investment is a serious matter for resource-constrained  
12 farmers, for whom the consequences of a years' failure may be felt over more  
13 than one season. I will explore through a few examples the implications for soil  
14 science of uncertainties about the unknown and uncertainties about responses,  
15 recognising that there is still a third domain of research questions not addressed  
16 here that is concerned with how to reduce uncertainty in agroecosystems.

17

### 18 *Uncertainty about the unknown*

19 In the 1940s a group of competent toxicologists led by William B. Deichmann  
20 conducted a number of thorough studies using state-of-the-art methods to  
21 conclude that the active ingredient dichloro-diphenyl-trichloroethane, or DDT,  
22 could be safely released to the environment for its use as insecticide. DDT was  
23 one of the first wide spread synthetic pesticides, and its widespread use led to  
24 resistance in many insect species. In the early 1970s, a paper authored by  
25 Deichmann (1972) himself and other studies provided enough evidence for the  
26 US Environmental Protection Agency to finally forbid the use of DDT as it became  
27 known to be toxic to humans, persistent in the environment, travel long  
28 distances in the upper atmosphere, and accumulate in fatty tissues of living  
29 organisms. What did actually happen between the 1940s and the 1970s? Why  
30 was DDT first considered innocuous or degradable and 30 years later banned  
31 and labelled as poisonous for humans, wildlife and the environment?

32 There are several possible answers to these questions. In the first place, the  
33 ecotoxicity of certain chemicals when applied in small doses may only appear

1 through cumulative effects (cf. <http://www.efsa.europa.eu/fr/node/872721>).  
2 Time is needed for problems to arise, or to become evident. Second, and most  
3 importantly, the capacity of science to detect the adverse effects of a certain  
4 molecule released to the environment can progress substantially in 30 years.  
5 Problems that were overlooked or remained undetected in the past could be  
6 later on well understood and documented. (And the amount of scientific  
7 evidence that needs to be accumulated to be able to bend the arm of the chemical  
8 industry in court cases is not a minor detail). Examples such as this one should  
9 teach us about the long-term risk (uncertainty) associated with the widespread  
10 release of synthetic molecules, either as chemical formulations or produced by  
11 genetically modified organisms (cf. Cheeke et al., 2012), into the environment.  
12 Alarming ideas such as the commercial release of genetically engineered  
13 microorganisms for soil amendment have been underway for a while (e.g.  
14 Viebahn et al., 2009), with unknown consequences for soils and the environment.

15

16 The adverse effects of certain soil management practices will only arise once a  
17 certain sustainability threshold is crossed. This is the case, for example, of  
18 turbidity regimes in shallow lakes as affected by the continuous charge of  
19 incoming nutrients in regions of intensive crop and animal agriculture (e.g.,  
20 Scheffer et al., 2001). Such thresholds are often termed 'tipping-points'  
21 associated with non-linear, irreversible or hardly reversible dynamics that  
22 describe multiple possible equilibriums (e.g., Walker et al., 2010). Evidence of  
23 such complex dynamics in agroecosystems is analysed in Tiftonell (2014b),  
24 where household dynamics and their livelihood strategies are portrayed as  
25 complex systems that follow non-linear trajectories, with impacts on soil  
26 productivity and spatial heterogeneity. Lower equilibrium situations, in which  
27 farms are caught within vicious cycles of soil fertility depletion, low productivity,  
28 meagre incomes and poor investment capacity to restore soils are often termed  
29 poverty traps (Tiftonell and Giller, 2013). Further evidence on the dynamics of  
30 smallholder African households and their impact on soils was presented by  
31 Valbuena et al. (2015), who suggested that they often behave as 'moving targets'  
32 for soil research for development.

33



1 *Uncertainty about response patterns*

2 Why would farmers invest in actions to restore degraded soils if they do not  
3 know the possible outcomes of such actions? The dynamics of soil  
4 responsiveness to restorative measures can be characterised by two attributes:  
5 hysteresis and time lags (Tittonell et al., 2012). Hysteretic responses are  
6 desirable, so that the trajectory of soil recovery diverges as much as possible  
7 from the one of degradation, and soils may in time recover properties that are as  
8 close as possible to those exhibited by non-degraded soils (Figure 3). In a long-  
9 term study in Benin diverse soil management practices, from a control without  
10 soil amendments and crop residue removal, to a full treatment with application  
11 of mineral and organic fertilisers and crop residue incorporation to soil, were  
12 compared for 20 consecutive years. After 10 years, however, soil in the control  
13 treatment degraded to such an extent that maize yields became virtually nil (red  
14 markers in Fig. 3B). During the next 10 years, in which these soils received  
15 amendments of organic and mineral fertilisers and of crop residues at the same  
16 level as the full treatment (blue markers in Fig. 3B) their productivity recovered,  
17 but never reached the level recorded in soils that received such inputs  
18 throughout the 20 years of the experiment (green markers in Fig. 3B); the  
19 relative yield was about 60%. In some cases, although hysteretic responses are  
20 achievable and soils can potentially be restored, the first signs of response to  
21 restorative measures only show up after a number of years of farmers'  
22 investment (e.g. Corral et al., 2015). Such time lags often deter farmers'  
23 investments in soil restoration measures. Note now in Fig. 3B that when the  
24 degraded soil started receiving organic matter and nutrient inputs it  
25 immediately produced a yield that was comparable with the initial yield without  
26 inputs, and it took four years before a substantial response was obtained.  
27

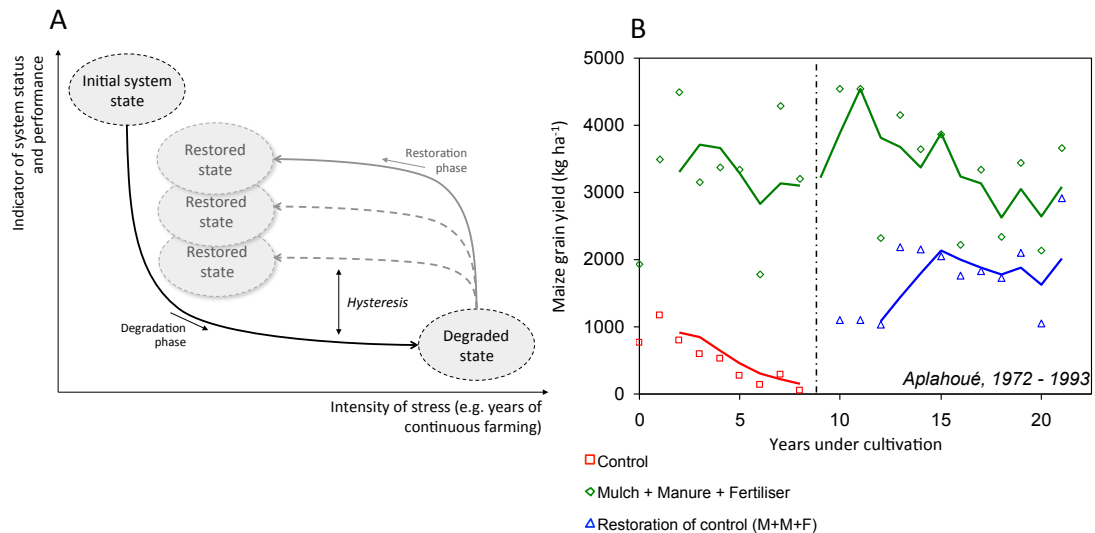

1  
 2 Figure 3: (A) Schematic representation of hysteretic responses to soil rehabilitation in which  
 3 three alternative 'restored states' are represented; (B) Maize yields without nutrient inputs and  
 4 crop residue removal (control) and with additions of manure, fertiliser and crop residues from  
 5 the beginning or after year 10 (restoration of control) in a long term experiment in Aplahoué,  
 6 Benin. Source: *Institut National de Recherches Agronomiques du Benin (INRAB)*.

7  
 8 Farmers perceive uncertainty in responses mostly in the short term. Farmers  
 9 engaged in a 4-year development project supporting sustainable agricultural  
 10 intensification practices in 3600 upland rice fields in Madagascar were trained  
 11 and encouraged to adapt conservation agriculture and nutrient management  
 12 practices as they saw fit (Bruelle et al., 2015). As initial responses to synthetic  
 13 fertiliser applications were highly variable, with yields ranging from 0.4 to 4.2 t  
 14 ha<sup>-1</sup> on the most risky hillside fields, farmers adopted conservative fertiliser  
 15 rates, intuitively targeting the highest efficiency zone of a fertiliser response  
 16 curve. Farmers' fertiliser N rates on hillside fields (n = 857) were in the order of  
 17 20 to 35 kg ha<sup>-1</sup> on average. The variability in crop responses observed was large  
 18 and multivariate, which is a common phenomenon observed on smallholder  
 19 farms (e.g. Vanlauwe et al, 2006; Wopereis et al., 2006; Zingore et al., 2007;  
 20 Tittonell et al., 2008; Fermont et al., 2009; Diarisso et al., 2015). The analysis of  
 21 yield variability using classification and regression trees revealed that significant  
 22 yield responses to N fertilisers (>15%) were only observed in 55% of the fields  
 23 and only in two out of four years, with a cut-off threshold of 28 kg ha<sup>-1</sup> N applied  
 24 (cf. Bruelle et al., 2015). Amongst the fields that received less than 28 kg ha<sup>-1</sup>,

1 13% of them exhibited higher yields than the average of fields receiving greater  
 2 fertiliser rates. It is not surprising that such uncertainty in crop responses to  
 3 synthetic fertilisers deters resource-constrained farmers from investments in  
 4 supposedly 'quick fixes' for soil fertility management.

5  
6

7 **3. Soil science priorities for food security and nutrition (SDG 2)**

8

9 In the introduction to this paper I proposed five priority areas that soil science  
 10 needs to address in order to contribute to food security and nutrition (SDG 2):

- 11 (i) Produce food where food is most needed;
- 12 (ii) Decouple agricultural production from its dependence on non-  
 13 renewable resources;
- 14 (iii) Recycle and make efficient use of available resources;
- 15 (iv) Adapt to and reduce the risks associated with global change; and
- 16 (v) Restore the capacity of degraded soils to provide food and ecosystem  
 17 services.

18 It takes much more than just good soil management to achieve food and  
 19 nutritional security, and addressing these priorities will often exceed the realm  
 20 of soil science, calling for trans-disciplinary research. Non-exhaustively,  
 21 however, Table 2 provides some examples of pathways that could be followed  
 22 and possible research for development approaches to address these priorities  
 23 from the perspectives of sustainability, complexity and uncertainty.

24  
25

| Table 2: Soil research for development priorities to achieve UN Sustainable Development Goal 2 Food Security and Nutrition, and examples of approaches from the perspectives of sustainability (what needs to happen), complexity (what do we know/ should consider) and uncertainty (foresee and minimise what could go wrong) |                                                                                                                                                                                |                                                                                                                                                                                         |                                                                                                                                                           |
|---------------------------------------------------------------------------------------------------------------------------------------------------------------------------------------------------------------------------------------------------------------------------------------------------------------------------------|--------------------------------------------------------------------------------------------------------------------------------------------------------------------------------|-----------------------------------------------------------------------------------------------------------------------------------------------------------------------------------------|-----------------------------------------------------------------------------------------------------------------------------------------------------------|
| Priority                                                                                                                                                                                                                                                                                                                        | Sustainability                                                                                                                                                                 | Complexity                                                                                                                                                                              | Uncertainty                                                                                                                                               |
| (i) Produce food where food is most needed(*)                                                                                                                                                                                                                                                                                   | Design food production systems and soil management technologies adapted to the context of resource-poor, less favourable, or less developed regions;<br><br>Think beyond major | Transdisciplinary understanding of institutional, societal (cultural) and ecological interactions in resource-poor, less favourable or less developed regions;<br><br>Understanding and | How to make food production systems more resilient and adaptable to shocks and stresses through diversification?<br><br>What kind of credit and insurance |

|                                                             |                                                                                                                                                                                                                                                                           |                                                                                                                                                                                                                                                                                                          |                                                                                                                                                                                                                                                                     |
|-------------------------------------------------------------|---------------------------------------------------------------------------------------------------------------------------------------------------------------------------------------------------------------------------------------------------------------------------|----------------------------------------------------------------------------------------------------------------------------------------------------------------------------------------------------------------------------------------------------------------------------------------------------------|---------------------------------------------------------------------------------------------------------------------------------------------------------------------------------------------------------------------------------------------------------------------|
|                                                             | <p>staple foods to design diverse, nutrition-sensitive landscapes;</p> <p>Promote local autonomy and belligerence in food systems governance;</p>                                                                                                                         | <p>exploiting the role of man-made 'fertility islands' in agroecosystems and other forms of indigenous precision agriculture;</p>                                                                                                                                                                        | <p>policies/mechanisms are there to assist in case of natural and human-made disasters?</p>                                                                                                                                                                         |
| (ii) Decouple agriculture from non-renewable resources      | <p>Intensification of food production systems through diversification and ecological replacement;</p> <p>Foster the provision of soil-mediated ecosystem services (e.g. nutrient regulation, biological N fixation)</p>                                                   | <p>Understanding of soil trophic networks and biodiversity, and their contribution to nutrient capture and cycling;</p> <p>Understanding to what extent N fixation by organisms other than legume plants contribute to ecosystem's N budget (e.g. in grasslands);</p>                                    | <p>How to foster the provision of ecosystem services to reduce pest impacts (e.g., pest regulation, soil suppressiveness)?</p> <p>How to minimize agriculture's dependence on fossil fuels and volatile oil markets?</p>                                            |
| (iii) Recycle and make efficient use of available resources | <p>Look beyond partial efficiencies at plot/crop scale to embrace whole-system efficiency at farm and landscape levels;</p> <p>Improve the recycling of energy and matter within and between agroecosystems, and between rural and urban areas;</p>                       | <p>Efficiency is not scale-agnostic: new theory is needed, perhaps ascendancy (cf. Ulanowicz, 2001), to measure systems' efficiencies at farm and landscape level;</p> <p>Understanding the links between biodiversity and efficiency at different scales;</p>                                           | <p>Introduce the notion of risks in the calculation of efficiencies;</p> <p>Can risks of leakages be minimized through recycling?</p> <p>What are the tradeoffs associated with pursuing efficiency at one single scale/component?</p>                              |
| (iv) Adapt to and reduce risks from global change           | <p>Foster the provision of soil-mediated ecosystem services (e.g. water regulation);</p> <p>Ecological intensification of food production systems through diversification and exploitation of niche-complementarities (e.g. crop-livestock-tree systems);</p>             | <p>Understanding the relationship between functional diversity of soil organisms and adaptive capacity in the face of climate change;</p> <p>Analysis of nature's structure-function relations and adaptability mechanisms to inform agroecosystems design (e.g. ligneous components in grasslands);</p> | <p>How can soil act as a reactor to detoxify the environment?</p> <p>What are meaningful indicators and tipping points to monitor soil functioning and service provision?</p> <p>How can soil information best contribute to insurance policies and mechanisms?</p> |
| (v) Restore degraded soils                                  | <p>Reduce time lags and initial investments;</p> <p>Whenever possible, restore soils while producing;</p> <p>Make use of locally available resources and knowledge for soil restoration;</p> <p>Promote local autonomy and ownership in soil restoration initiatives;</p> | <p>Understanding of mechanisms behind hysteretic and non-hysteretic responses to soil restoration;</p> <p>Understanding of sequential processes in soil and associated functions during a restoration phase.</p>                                                                                         | <p>What are the costs and benefits associated with restoring soils?</p> <p>How can smallholder farmers overcome time lags?</p> <p>What are the institutional and governance mechanisms necessary to ensure long-term engagement in soil restoration?</p>            |

(\*) Although current agriculture is producing enough calories to feed everyone on earth (2720 Kcal person<sup>-1</sup> year<sup>-1</sup> produced versus 1800-2100 K Cal person<sup>-1</sup> year<sup>-1</sup> required), and although food security depends on food availability as much as on access to food, stability and utilisation, there is undisputable evidence that addressing current food shortages is not just a matter of improving food distribution worldwide (e.g. UNCTAD, 2014). For as long as we leave the responsibility of distributing food to the international market forces, increasing global food production will not be enough to satisfy the needs of the poorest families in remote, hardly accessible rural areas. Paradoxically, the majority of people who suffer from hunger worldwide are smallholder farmers and/or rural dwellers that have the potential to produce enough food to meet (in part or fully) the requirements of their families. Producing food where it is most needed is hence a priority to address food security, nutritional voids, and income generation in rural areas.

1  
2  
3  
4  
5  
6  
7  
8  
9  
10  
11  
12  
13  
14  
15  
16  
17  
18  
19  
20  
21  
22  
23  
24  
25  
26  
27  
28  
29

Let us now think critically, in the light of sustainability, complexity and uncertainties, about the model of agricultural intensification that several international organisations are pushing – with good intentions, no doubt – in developing countries: What is the reasoning behind the idea that a mono-culture of a uniform maize hybrid receiving large inputs of synthetic fertilisers and other agrochemicals is the most appropriate cropping system for a subsistence, sometimes illiterate household in a remote, food- and land-insecure, hardly accessible rural village exposed to climatic risks and demographic pressure, and located in a fragile ecosystem in the tropics, where agrochemical prices are ten times higher than those paid by farmers in e.g. Europe? (On input prices in rural Africa cf. Tittonell et al., 2007). Can such simplified and risk-prone cropping system really contribute to food security, namely availability, access, stability and utilization of food, and nutritional diversity in smallholder contexts? Let us think about the sustainability of this intensification strategy, beyond considering the ecological consequences of simplifying tropical ecosystems in this way, and just from a mere economic perspective: What would happen with rural food security following the uniform hybrid + fertiliser strategy if, for example, oil prices (and chemical fertilisers) sky rocket or if multinational seed companies manage to enforce payments for intellectual property upon farmers as is now happening in other parts of the world? Will this strategy be truly sustainable?

Sustainability, complexity and uncertainty represent respectively our aspirations, our understanding, and the challenges we face towards the future management of agroecosystems to achieve the UN Sustainable Development Goals. Although several epistemological questions remain unanswered around these notions, particularly around sustainability as a guiding concept, they represent three complementary perspectives from where we can analyse the

1 potential of our contributions from soil science. On the basis of this, here are  
2 three lines of action that may help us soil scientists of the 21<sup>st</sup> Century make our  
3 research more impact-oriented towards the achievement of food security and  
4 nutrition:

- 5 1. Let us invest effort and creativity in ‘translating’ the new insights and  
6 understandings coming from soil science into knowledge-intensive  
7 innovations that can contribute to food security. Exciting research results  
8 on formerly unknown soil interactions in the root zone are a sure ticket to  
9 a high impact publication. Yet the path from understanding processes in  
10 soil to implementing this knowledge in the design of sustainable  
11 agroecosystems is a long and tortuous one. We can contribute to make it  
12 shorter. But doing research on applied science, moving from questions  
13 such as ‘*how does this work*’ (analysis) towards ‘*how to make it work*’  
14 (design) penalises soil scientists, as design-oriented research is hard to  
15 publish in high impact journals – an obvious call to rethinking the  
16 scientific reward systems in research and the academia;
- 17 2. Let us dare to challenge the establishment. Many of us in soil science are  
18 under the influence of those who were our mentors, who provided  
19 guidance and/or trained us as researchers. They are the ones who  
20 nowadays act as consultants for international organisations, who direct  
21 research institutes, participate in boards, act as journal editors, evaluate  
22 projects, etc. Most soil scientists of that generation were educated and  
23 developed their careers within the paradigm of the green revolution:  
24 improved germplasm, fertilisers and agrochemicals can fix anything.  
25 Some scientist of that generation knew how to adapt and change their  
26 views and discourses as new evidence and methods came along. For  
27 others, a change of view at this point is felt in a way as being equivalent to  
28 accepting that what they did in the past was wrong. Let us engage in  
29 persuasive actions to break such inertia, and let us not be shy when it  
30 comes to defending our new insights – provided that they are supported  
31 by sound scientific evidence;
- 32 3. Let us contribute to creating credible narratives that bring important  
33 messages to society and/or install useful ideas among agroecosystem

1 managers, policy and decision-makers. Narratives are well-packed pieces  
2 of information that convey simple, common sense messages. A popular  
3 one is this: "*it will be impossible to feed the world without GM crops*".  
4 Although this assertion does not resist any serious scientific scrutiny, the  
5 industry managed to install this message successfully amongst some  
6 policy makers, the public opinion in general and, most disquietingly,  
7 among certain members of the scientific community. I propose to liaise  
8 with communication experts to develop simple narratives to convey  
9 meaningful messages from soil science to society, with the ultimate  
10 intention of influencing policy and research agendas;

11

12 The complexity of the social-ecological systems where food is produced and  
13 consumed requires trans-disciplinary research, knowledge brokerage, and a  
14 permanent dialogue with policy makers. The relationship between scientific  
15 evidence and policy development and implementation is not rectilinear, but a  
16 rocky path (Caceres et al., 2016; Keesstra et al., 2016). It would be naïve to think  
17 that we can feed the world just with soil science, as the title of this paper  
18 ironically claims. Hunger is not the result of insufficient agricultural production.  
19 Hunger is the result of poverty and inequality. Feeding the world, or achieving  
20 the second of the UN Sustainable Development Goals, requires much more than  
21 soil science and it certainly exceeds agricultural research. Yet it helps to be  
22 aware of the role we can play in this puzzle, a role that is not minor.

23

24

25 **References**

26 Alvarez S., Rufino MC., Vayssières J., Salgado P., Tittonell P., Tillard E., Bocquier F., 2014.  
27 Whole-farm nitrogen cycling and intensification of crop-livestock systems in the  
28 highlands of Madagascar: an application of network analysis. *Agricultural Systems*  
29 126, 15-37.

30 Anderson, M.W., Teisl, M.F., Noblet, C.L., 2015. Whose values count: is a theory of social  
31 choice for sustainability science possible? *Sustainability Science*, 1-11.  
32 <http://dx.doi.org/10.1007/s11625-015-0345-1>.

33 Andrieu, N., Vayssieres, J., Corbeels, M., Blanchard, M., Vall, E., Tittonell, P., 2015. From  
34 farm scale synergies to village scale trade-offs: Cereal crop residues use in an agro-  
35 pastoral system of the Sudanian zone of Burkina Faso. *Agricultural Systems* 134, 84-  
36 96.

- 1 Aravindakshan, S., Rossi, F. J., & Krupnik, T. J. (2015). What does benchmarking of wheat  
2 farmers practicing conservation tillage in the eastern Indo-Gangetic Plains tell us  
3 about energy use efficiency? An application of slack-based data envelopment  
4 analysis. *Energy*, 90, 483-493.
- 5 Bai, Z., Dent, D., Olsson, L., Schaepman, M.E., 2008. Proxy global assessment of land  
6 degradation. *Soil Use and Management* 24:223-243.
- 7 Baudron, F., Delmotte, S., Corbeels, M., Herrera, J.M. & Tittonell, P., 2014. Multi-scale  
8 trade-off analysis of cereal residue use for livestock feeding vs. soil mulching in the  
9 Mid-Zambezi Valley, Zimbabwe. *Agricultural Systems* 134, 97-106.
- 10 Bruelle, G., Naudin, K., Scopel, E., (...), Rabeharisoa, L., Tittonell, P., 2015. Short-to mid-  
11 term impact of conservation agriculture on yield variability of upland rice: Evidence  
12 from farmer's fields in Madagascar. *Experimental Agriculture* 51, 66-84.
- 13 Cáceres, D.M., Silvetti, F., Díaz, S., 2016. The rocky path from policy-relevant science to  
14 policy implementation - a case study from the South American Chaco. *Current*  
15 *Opinion in Environmental Sustainability* 19, 57-66.
- 16 Carter, S., Murwira, H., 1995. Spatial variability in soil fertility management and crop  
17 response in Mutoko Communal Area, Zimbabwe. *Ambio*, 24: 77 – 84.
- 18 Castellanos-Navarrete, A., Tittonell, P.A., Rufino, M.C. & Giller, K.E., 2015. Feeding, crop  
19 residue and manure management for integrated soil fertility management - A case  
20 study from Kenya. *Agricultural Systems* 134, 24-35.
- 21 Cheeke, T.E., Todd N. Rosenstiel, and Mitchell B. Cruzan. 2012. Evidence of reduced  
22 arbuscular mycorrhizal fungal colonization in multiple lines of Bt maize. *American*  
23 *Journal of Botany* 99, 700-707. DOI: 10.3732/ajb.1100529
- 24 Coe R., Sinclair F., Barrios E. 2014. Scaling up agroforestry requires research 'in' rather  
25 than 'for' development. *Current Opinion in Environmental Sustainability* 6: 73-77.
- 26 Conway, G.R., 1987. The properties of agroecosystems. *Agricultural Systems* 24 1987,  
27 95-117.
- 28 Corral-Nunez, G., Opazo-Salazar, D., GebreSamuel, G., Tittonell, P., Gebretsadik, A.,  
29 Gebremeskel, Y., Tesfay, G., van Beek, C.L., 2014. Soil organic matter in Northern  
30 Ethiopia, current level and predicted trend: a study case of two villages in Tigray. *Soil*  
31 *Use and Management* 30, 487-495.
- 32 Cortez Arriola, J. , Groot, J.C.J. , Amendola Massiotti, R.D. , Scholberg, J.M.S. , Mariscal  
33 Aguayo, D.V. , Tittonell, P.A. , Rossing, W.A.H., 2014. Resource use efficiency and farm  
34 productivity gaps of smallholder dairy farming in North-west Michoacán, Mexico.  
35 *Agricultural Systems* 126, 15 - 24.
- 36 Deichman, W.B., 1972. The debate on DDT. *Arch. Toxikol.* 29 (Springer), 1 – 27.
- 37 Diarisso, T., Corbeels, M., Andrieu, N., Djamen, P., Douzet, J.-M., Tittonell, P., 2015. Soil  
38 variability and crop yield gaps in two village landscapes of Burkina Faso. *Nutrient*  
39 *Cycling in Agroecosystems*, 10.1007/s10705-015-9705-6.
- 40 Fermont, A.M., Tittonell, P., Baguma, Y., Ntawuruhunga, P., Giller, K.E., 2009. Towards  
41 understanding factors that govern fertilizer response in cassava: lessons from East  
42 Africa. *Nutrient Cycling in Agroecosystems* 86, 133-151.
- 43 Figueroa, B.M, Tittonell, P., Ohiokpehai, O., Giller, K.E., 2008. The contribution of  
44 traditional vegetables to household food security in two communities of Vihiga and  
45 Migori Districts, Kenya. *International Symposium: Underutilized plants for food,*  
46 *nutrition, income and sustainable development*, 3-7 March, Arusha, Tanzania.
- 47 Fresco, L.O. and E. Westphal, 1988. A Hierarchical Classification of Farm Systems.  
48 *Experimental Agriculture* 24, 399-419.
- 49 Giller, K.E., Pablo Tittonell, Mariana C Rufino, Mark T van Wijk, Shamie Zingore, Paul  
50 Mapfumo, Samuel Adjei-Nsiah, Mario Herrero, Regis Chikowo, Marc Corbeels, Edwin



- 1 C Rowe, Freddy Baijukya, Amos Mwijage, Jo Smith, Edward Yeboah, W J van de Burg,  
2 Ousmane M Sanogo, Michael Misiko, Nico de Ridder, Stanley Karanja, Cramer Kaizzi,  
3 James K'ungu, Moses Mwale, Dieudonne Nwaga, Cesare Pacini, Bernard Vanlauwe,  
4 2010. Communicating complexity: Integrated assessment of trade-offs within African  
5 farming systems to support innovation and development. *Agricultural Systems* 104,  
6 191–203.
- 7 Gunderson L., Holling C.S., 2001. *Panarchy: Understanding Transformations in Systems*  
8 *of Humans and Nature*, Island Press, p.21, 2001.
- 9 Henry, M., Tittonell, P., Manlay, R., Bernoux, M., Albrecht, A., Vanlauwe, B., 2009  
10 Biodiversity, C stocks and sequestration potential in aboveground biomass in  
11 smallholder farming systems of western Kenya. *Agriculture, Ecosystems and*  
12 *Environment* 129, 238–252.
- 13 Isaac, M.E. 2012. Agricultural information exchange and organizational ties: the effect of  
14 network topology on managing agrodiversity. *Agricultural Systems* 109, 9-15.
- 15 James, P.; Magee, L.; Scerri, A.; Steger, M.B., 2015. *Urban Sustainability in Theory and*  
16 *Practice*. London: Routledge.
- 17 Kates, R.W., 2011. What kind of a science is sustainability science? *PNAS* (108) 49,  
18 19449–19450.
- 19 Keesstra, S. D., Bouma, J., Wallinga, J., Tittonell, P., Smith, P., Cerdà, A., Montanarella, L.,  
20 Quinton, J., Pachepsky, Y., van der Putten, W. H., Bardgett, R. D., Moolenaar, S., Mol, G.,  
21 and Fresco, L. O: FORUM paper: The significance of soils and soil science towards  
22 realization of the UN sustainable development goals (SDGs), *SOIL Discuss.*,  
23 doi:10.5194/soil-2015-88, in review, 2016.
- 24 Khonje, K. 2012. Analysis of the role of social networks in adoption of soil and water  
25 conservation technologies in Northern Malawi. MSc Thesis, Wageningen University,  
26 41p.
- 27 Lupatini, M., Jacques, R.J.S., Antonioli, Z.I., Suleiman, A.K.A., Fulthorpe, R.R., Roesch,  
28 L.F.W., 2012. Land-use change and soil type drivers of fungal and archaeal  
29 communities in the Pampa biome. *World Journal of Microbiology and Biotechnology*  
30 29, 223-233.
- 31 Kahle, L.R., Gurel-Atay, E., Eds (2014). *Communicating Sustainability for the Green*  
32 *Economy*. New York: M.E. Sharpe. ISBN 978-0-7656-3680-5.
- 33 Magee, L., Andy Scerri, Paul James, Jaes A. Thom, Lin Padgham, Sarah Hickmott, Hepu  
34 Deng, Felicity Cahill, 2013. *Reframing social sustainability reporting: Towards an*  
35 *engaged approach*. *Environment, Development and Sustainability* (Springer).
- 36 Meynard, J-M., Dedieu, B., Bos, A.P., 2012. Re-design and co-design of farming systems.  
37 An overview of methods and practices. In: *Farming Systems Research into the 21st*  
38 *century: The new dynamic*. Ika Darnhofer, David Gibon, Benoît Dedieu, Editors, 2012,  
39 Springer, 407-432
- 40 Prell C., Hubacek K., Reed M., Quinn C., Jin N., Holden J., Burt T., Kirby M., Sendzimir J.  
41 2007. If you have a hammer everything looks like a nail: traditional versus  
42 participatory model building. *Interdisciplinary Science Reviews* 32(3): 263-282.
- 43 Prudencio, C.F., 1993. Ring management of soils and crops in the West African semi-arid  
44 tropics: the case of the Mossi farming system in Burkina Faso. *Agric. Ecosyst. Environ.*  
45 47, 237–264.
- 46 Rufino, M.C., Dury, J., Tittonell, P., van Wijk, M.T., Herrero, M., Zingore, S., Mapfumo, P.,  
47 Giller, K.E., 2011. Collective management of feed resources at village scale and the  
48 productivity of different farm types in a smallholder community of North East  
49 Zimbabwe. *Agricultural Systems* 104, 175–190.

- 1 Rufino, M.C., Tittonell, P., Reidsma, P., Lopez-Ridaura, S., Hengsdijk, H., Giller, K.E.,  
2 Verhagen, A., 2009. Characterisation of N flows and N cycling in smallholder crop-  
3 livestock systems in the highlands of East and southern Africa using network  
4 analysis. *Nutrient Cycling in Agroecosystems* 313, 19-37.
- 5 Scheffer, M., Carpenter, S., Foley, J.A., Folke, C., Walker, B., 2001. Catastrophic shifts in  
6 ecosystems. *Nature* 413 (6856), 591-596.
- 7 Siegel, K.R., M.K. Ali, A. Srinivasiah, R.A. Nugent, K.V. Narayan, 2014. Do we produce  
8 enough fruits and vegetables to meet global health need? *PloS one* 9 (8)  
9 <http://dx.doi.org/10.1371/journal.pone.0104059>.
- 10 Speelman, E.N., García-Barrios, L.E., Groot, J.C.J., Tittonell, P., 2014. Gaming for  
11 smallholder participation in the design of more sustainable agricultural landscapes.  
12 *Agricultural Systems* 126, 62-75.
- 13 Tittonell, P., van Dis, R., Vanlauwe, B., Shepherd, K., 2015. Managing soil heterogeneity in  
14 smallholder African farmland requires new forms of precision agriculture. In Lal, R. &  
15 Stewart, B.A. (eds.) *Precision Agriculture*, Earthscan, in press.
- 16 Tittonell, P., 2014a. Ecological intensification – sustainable by nature. *Current Opinion*  
17 *on Environmental Sustainability* 8, 53-61
- 18 Tittonell, P., 2014b. Livelihood strategies, resilience and transformability in African  
19 agroecosystems. *Agric. Syst.* 126, 3-14.
- 20 Tittonell, P., Giller, K.E., 2013. When yield gaps are poverty traps: The paradigm of  
21 ecological intensification in African smallholder agriculture. *Field Crop Res.* 143, 76-  
22 90.
- 23 Tittonell, P., Muriuki, A., Klapwijk, C.J., Shepherd, K.D., Coe, R., Vanlauwe, B., 2013. Soil  
24 heterogeneity and soil fertility gradients in smallholder agricultural systems of the  
25 East African highlands. *Soil Sci. Soc. Amer. J.* 77, 525-538.
- 26 Tittonell, P., Scopel, E., Andrieu, N., Posthumus, H., Mapfumo, P., Corbeels, M., van  
27 Halsema, G.E., Lahmar, R., Lugandu, S., Rakotoarisoa, J., Mtambanengwe, F., Pound, B.,  
28 Chikowo, R., Naudin, K., Triomphe, B., Mkomwa, S., 2012. Agroecology-based  
29 aggradation-conservation agriculture (ABACO): Targeting innovations to combat soil  
30 degradation and food insecurity in semi-arid Africa. *Field Crop Res.*, 1-7.
- 31 Tittonell, P., Muriuki, A.W., Shepherd, K.D., Mugendi, D., Kaizzi, K.C., Okeyo, J., Verchot, L.,  
32 Coe, R., Vanlauwe, B., 2010. The diversity of rural livelihoods and their influence on  
33 soil fertility in agricultural systems of East Africa - A typology of smallholder farms.  
34 *Agricultural Systems* 103, 83-97.
- 35 Tittonell, P., Vanlauwe, B., Corbeels, M., Giller, K.E., 2008. Yield gaps, nutrient use  
36 efficiencies and responses to fertilisers by maize across heterogeneous smallholder  
37 farms in western Kenya. *Plant and Soil* 313, 19-37.
- 38 Tittonell, P., Vanlauwe, B., de Ridder, N., Giller, K.E., 2007. Heterogeneity of crop  
39 productivity and resource use efficiency within smallholder Kenyan farms: soil  
40 fertility gradients or management intensity gradients? *Agricultural Systems* 94, 376-  
41 390.
- 42 Tittonell, P., Vanlauwe, B., Leffelaar, P.A., Rowe, E., Giller, K.E., 2005. Exploring diversity  
43 in soil fertility management of smallholder farms in western Kenya. I. Heterogeneity  
44 at region and farm scale. *Agriculture, Ecosystems and Environment* 110, 149-165.
- 45 Tittonell, P., Vanlauwe, B., Leffelaar, P.A., Shepherd, K.D., Giller, K.E., 2005. Exploring  
46 diversity in soil fertility management of smallholder farms in western Kenya. II.  
47 Within-farm variability in resource allocation, nutrient flows and soil fertility status.  
48 *Agriculture, Ecosystems and Environment* 110, 166-184.

- 1 Tittonell, P., 2003. Soil fertility gradients in smallholder farms of western Kenya. Their  
2 origin, magnitude and importance. Quantitative Approaches in Systems Analysis No.  
3 25, ISBN 90-6754-713-1, Wageningen, The Netherlands, pp. 233.
- 4 Ulanowicz RE, 2001. Information theory in ecology. *Comp Chem* 25: 393-399.
- 5 UNCTAD (2013) Least developed countries report 2013 – growth with employment for  
6 inclusive and sustainable development, 20 Nov 2013, 3365.4 KB
- 7 UNCTAD (2014) Economic development in Africa report 2014 – catalysing investment  
8 for transformative growth in Africa, 04 Jul 2014, 110 page(s), 1020.3 KB
- 9 United Nations General Assembly (March 20, 1987). "Report of the World Commission  
10 on Environment and Development: Our Common Future; Transmitted to the General  
11 Assembly as an Annex to document A/42/427 - Development and International Co-  
12 operation: Environment; Our Common Future, Chapter 2: Towards Sustainable  
13 Development; Paragraph 1". United Nations General Assembly.
- 14 Valbuena, D., Groot, J.C.J., Mukalama, J., Gérard, B., Tittonell, P., 2015. Improving rural  
15 livelihoods as a "moving target": trajectories of change in smallholder farming  
16 systems of Western Kenya. *Regional Environmental Change*, DOI 10.1007/s10113-  
17 014-0702-0.
- 18 van Noordwijk, M., Brussaard, L., 2014. Minimizing the ecological footprint of food:  
19 closing yield and efficiency gaps simultaneously? *Curr. Opin. Environ. Sustain.* 8, 62-  
20 70.
- 21 Vandermeer J, Perfecto I., 2013. Complex Traditions: Intersecting Theoretical  
22 Frameworks in Agroecological Research. *Agroecol Sustain Food Systems* 37, 76-89  
23 DOI: 10.1080/10440046.2012.717904.
- 24 Vanlauwe, B., Tittonell, P., Mukalama, J. 2006. Within-farm soil fertility gradients affect  
25 response of maize to fertilizer application in western Kenya. *Nutrient Cycling in*  
26 *Agroecosystems* 76, 171-182.
- 27 Viebahn, M., Smit, E., Glandorf, D.C.M., Wernars, K., Bakker, P.A.H.M., 2009. Effect of  
28 genetically modified bacteria on ecosystems and their potential benefits for  
29 bioremediation and biocontrol of plant diseases – a review. E. Lichtfouse (ed.)  
30 *Sustainable Agriculture Reviews* 2, Springer, p.45. doi 10.1007/978-90-481-2716-  
31 0\_4.
- 32 Vlek, P., Le, Q.B., & Tamene, L. 2008. Land Decline in Land - rich Africa - A Creeping  
33 Disaster in the Making. CGIAR Science Council Secretariat, Rome, Italy. 55 pp.
- 34 Walker, B., Sayer, J., Andrew, N.L., Campbell, B., 2010. Should enhanced resilience be an  
35 objective of natural resource management research for developing countries? *Crop*  
36 *Science* 50, 10-19.
- 37 Wopereis, M., A. Tamélokpo, K. Ezui, D. Gnakpénou, B. Fofana and H. Breman, 2006.  
38 Mineral fertilizer management of maize on farmer fields differing in organic inputs in  
39 the West African savanna. *Field Crops Research* 96, 355-362.
- 40 Zingore, S., H. K. Murwira, R. J. Delve and K. E. Giller, 2007. Soil type, management  
41 history and current resource allocation: Three dimensions regulating variability in  
42 crop productivity on African smallholder farms. *Field Crops Research* 101, 296-305.
- 43
